# Supplementary material
Source: HighWire-hosted journal article supplement (https://jnm.snmjournals.org/highwire/filestream/94781/field_highwire_adjunct_files/0/159715_Supplemental_Data.pdf)
Supplement: 159715_Supplemental_Data.pdf [file 159715_Supplemental_Data.pdf]

| Kinetic model         | AIC best model | Spectral analysis # of compartments | 2T4K  |       |       | 3T5KS |       |        | Logan plot | 2T3K   | SUV (60-90 min) |
|-----------------------|----------------|-------------------------------------|-------|-------|-------|-------|-------|--------|------------|--------|-----------------|
|                       |                |                                     | Vt    | K1/k2 | BP    | K1/k2 | k5    | Ki     | Vt         | Ki     | SUV             |
| AN01                  |                |                                     |       |       |       |       |       |        |            |        |                 |
| Gluteal               | 2T4K           | 3                                   | 0.379 | 0.100 | 2.782 | 0.090 | 0.009 | 0.0014 | 0.380      | 0.0022 | 0.636           |
| Gluteal retest        | 3T5KS          | 2                                   | 0.411 | 0.117 | 2.504 | 0.081 | 0.018 | 0.0018 | 0.357      | 0.0021 | 0.666           |
| Gluteal ratio t/rt    |                |                                     | 1.086 | 1.173 | 0.900 | 0.898 | 1.890 | 1.247  | 0.939      | 0.916  | 1.047           |
| Quadriceps            | 2T4K           | 3                                   | 0.332 | 0.079 | 3.194 | 0.073 | 0.011 | 0.0013 | 0.326      | 0.0020 | 0.509           |
| Quadriceps retest     | 3T5KS          | 2                                   | 0.340 | 0.091 | 2.725 | 0.074 | 0.022 | 0.0014 | 0.281      | 0.0017 | 0.512           |
| Quadriceps ratio t/rt |                |                                     | 1.025 | 1.154 | 0.853 | 1.012 | 1.909 | 1.104  | 0.863      | 0.846  | 1.006           |
| AN02                  |                |                                     |       |       |       |       |       |        |            |        |                 |
| Gluteal               | 3T5KS          | 3                                   | 0.357 | 0.120 | 1.966 | 0.102 | 0.021 | 0.0016 | 0.324      | 0.0020 | 0.573           |
| Gluteal retest        | 3T5KS          | 3                                   | 0.401 | 0.138 | 1.903 | 0.105 | 0.021 | 0.0017 | 0.338      | 0.0020 | 0.630           |
| Gluteal ratio t/rt    |                |                                     | 1.126 | 1.150 | 0.968 | 1.029 | 1.000 | 1.080  | 1.042      | 1.020  | 1.101           |
| Quadriceps            | 3T5KS          | 3                                   | 0.453 | 0.093 | 3.866 | 0.085 | 0.030 | 0.0019 | 0.339      | 0.0023 | 0.568           |
| Quadriceps retest     | 3T5KS          | 3                                   | 0.425 | 0.108 | 2.923 | 0.086 | 0.030 | 0.0017 | 0.312      | 0.0020 | 0.556           |
| Quadriceps ratio t/rt |                |                                     | 0.938 | 1.164 | 0.756 | 1.011 | 1.006 | 0.917  | 0.919      | 0.876  | 0.979           |
| AN03                  |                |                                     |       |       |       |       |       |        |            |        |                 |
| Gluteal               | 3T5KS          | 3                                   | 0.367 | 0.090 | 3.063 | 0.075 | 0.020 | 0.0018 | 0.335      | 0.0023 | 0.690           |
| Gluteal retest        | 3T5KS          | 4                                   | 0.378 | 0.086 | 3.386 | 0.073 | 0.019 | 0.0018 | 0.339      | 0.0023 | 0.690           |
| Gluteal ratio t/rt    |                |                                     | 1.030 | 0.955 | 1.105 | 0.969 | 0.954 | 0.987  | 1.012      | 0.997  | 1.001           |
| Quadriceps            | 3T5KS          | 3                                   | 0.486 | 0.082 | 4.934 | 0.071 | 0.036 | 0.0021 | 0.380      | 0.0024 | 0.692           |
| Quadriceps retest     | 3T5KS          | 4                                   | 0.467 | 0.086 | 4.410 | 0.077 | 0.034 | 0.0019 | 0.337      | 0.0022 | 0.650           |
| Quadriceps ratio t/rt |                |                                     | 0.963 | 1.056 | 0.894 | 1.092 | 0.935 | 0.895  | 0.889      | 0.898  | 0.940           |
| AN04                  |                |                                     |       |       |       |       |       |        |            |        |                 |
| Gluteal               | 3T5KS          | 3                                   | 0.329 | 0.091 | 2.617 | 0.061 | 0.020 | 0.0015 | 0.288      | 0.0018 | 0.516           |

|                           |       |   |       |       |       |       |       |        |       |        |       |
|---------------------------|-------|---|-------|-------|-------|-------|-------|--------|-------|--------|-------|
| Gluteal retest            | 2T4K  | 3 | 0.288 | 0.083 | 2.467 | 0.053 | 0.014 | 0.0013 | 0.272 | 0.0017 | 0.563 |
| Gluteal ratio t/rt        |       |   | 0.877 | 0.915 | 0.942 | 0.873 | 0.714 | 0.881  | 0.943 | 0.950  | 1.092 |
| Quadriceps                | 3T5KS | 3 | 0.327 | 0.078 | 3.173 | 0.072 | 0.025 | 0.0013 | 0.252 | 0.0016 | 0.424 |
| Quadriceps retest         | 2T4K  | 3 | 0.295 | 0.082 | 2.588 | 0.058 | 0.024 | 0.0012 | 0.229 | 0.0014 | 0.452 |
| Quadriceps ratio t/rt     |       |   | 0.904 | 1.051 | 0.816 | 0.808 | 0.956 | 0.942  | 0.909 | 0.875  | 1.064 |
| AN05                      |       |   |       |       |       |       |       |        |       |        |       |
| Gluteal                   | 3T5KS | 3 | 0.446 | 0.091 | 3.885 | 0.075 | 0.021 | 0.0022 | 0.406 | 0.0028 | 0.737 |
| Gluteal retest            | 3T5KS | 4 | 0.442 | 0.089 | 3.959 | 0.070 | 0.021 | 0.0021 | 0.403 | 0.0026 | 0.745 |
| Gluteal ratio t/rt        |       |   | 0.992 | 0.977 | 1.019 | 0.932 | 1.008 | 0.960  | 0.993 | 0.936  | 1.011 |
| Quadriceps                | 3T5KS | 3 | 0.491 | 0.073 | 5.762 | 0.061 | 0.037 | 0.0022 | 0.409 | 0.0025 | 0.656 |
| Quadriceps retest         | 3T5KS | 4 | 0.451 | 0.075 | 4.976 | 0.065 | 0.029 | 0.0019 | 0.360 | 0.0022 | 0.636 |
| Quadriceps ratio t/rt     |       |   | 0.917 | 1.038 | 0.864 | 1.071 | 0.772 | 0.857  | 0.879 | 0.886  | 0.970 |
| AN06                      |       |   |       |       |       |       |       |        |       |        |       |
| Gluteal                   | 3T5KS | 4 | 0.268 | 0.093 | 1.866 | 0.081 | 0.019 | 0.0012 | 0.246 | 0.0015 | 0.607 |
| Gluteal retest            | 3T5KS | 3 | 0.267 | 0.088 | 2.022 | 0.077 | 0.018 | 0.0011 | 0.233 | 0.0015 | 0.643 |
| Gluteal ratio t/rt        |       |   | 0.997 | 0.946 | 1.083 | 0.954 | 0.951 | 0.964  | 0.945 | 1.004  | 1.060 |
| Quadriceps                | 3T5KS | 4 | 0.248 | 0.065 | 2.788 | 0.061 | 0.028 | 0.0011 | 0.210 | 0.0013 | 0.498 |
| Quadriceps retest         | 2T4K  | 3 | 0.293 | 0.074 | 2.963 | 0.071 | 0.030 | 0.0011 | 0.207 | 0.0013 | 0.534 |
| Quadriceps ratio t/rt     |       |   | 1.182 | 1.130 | 1.063 | 1.158 | 1.079 | 0.958  | 0.985 | 0.952  | 1.071 |
| average change Gluteal    |       |   | 1.018 | 1.019 | 1.003 | 0.942 | 1.086 | 1.020  | 0.979 | 0.970  | 1.052 |
| STD                       |       |   | 8.6%  | 11.2% | 8.1%  | 5.5%  | 40.9% | 12.8%  | 4.3%  | 4.2%   | 4.1%  |
| TRT %                     |       |   | 6.2   | 8.5   | 6.6   | 7.0   | 17.6  | 8.6    | 4.0   | 3.9    | 5.0   |
| average change Quadriceps |       |   | 0.988 | 1.099 | 0.874 | 1.025 | 1.110 | 0.945  | 0.907 | 0.889  | 1.005 |

|       |       |      |       |       |       |      |      |      |      |
|-------|-------|------|-------|-------|-------|------|------|------|------|
| STD   | 10.4% | 5.7% | 10.4% | 12.0% | 40.5% | 8.5% | 4.3% | 3.6% | 5.3% |
| TRT % | 5.1   | 5.1  | 7.5   | 7.9   | 23.5  | 4.0  | 4.6  | 3.9  | 2.6  |

Supplemental Table 1. Kinetic modeling parameters for test-retest studies of SMGU.

AIC – Akaike Information Criterion; best fit model is indicated in the second column. 2T3K – two tissue irreversible model, 2T4K – two tissue reversible model, 3T5KS – three tissue sequential irreversible model, TRT – test-retest variability, AN01-06: each individual.
